# Supplementary material for: Cross‐Cultural Adaptation and Validation of the Simplified Chinese Version of the Lower Extremity Functional Scale
Source: Hindawi journal article supplement (doi:10.1155/2020/1421429), 2020-01-01
Supplement: f1 [file 1421429.f1.pdf]

## 简体中文版下肢功能评估量表 (SC-LEFS)

您从事下列活动时，是否会有任何困难？请在每个问题后勾选一个最符合的选项。

| 活动                  | 极度困难<br>或无法做到 | 非常困难 | 中等困难 | 有点困难 | 毫无困难 |
|---------------------|---------------|------|------|------|------|
| 1、您平日任何的工作、家务或学校的活动 | 0             | 1    | 2    | 3    | 4    |
| 2、您平时的爱好、休闲娱乐或运动    | 0             | 1    | 2    | 3    | 4    |
| 3、进出浴缸              | 0             | 1    | 2    | 3    | 4    |
| 4、在房间中走动            | 0             | 1    | 2    | 3    | 4    |
| 5、穿鞋或穿袜子            | 0             | 1    | 2    | 3    | 4    |
| 6、蹲下                | 0             | 1    | 2    | 3    | 4    |
| 7、提举物品，如将地上的整袋杂货拿起来 | 0             | 1    | 2    | 3    | 4    |
| 8、在家里做一些轻松的劳动       | 0             | 1    | 2    | 3    | 4    |
| 9、在家里做一些重体力劳动       | 0             | 1    | 2    | 3    | 4    |
| 10、上车或下车            | 0             | 1    | 2    | 3    | 4    |
| 11、走两条街道的路          | 0             | 1    | 2    | 3    | 4    |
| 12、走 1.5 公里         | 0             | 1    | 2    | 3    | 4    |
| 13、上下十个台阶（约一段楼梯）    | 0             | 1    | 2    | 3    | 4    |
| 14、站一个小时            | 0             | 1    | 2    | 3    | 4    |
| 15、坐一个小时            | 0             | 1    | 2    | 3    | 4    |
| 16、在平坦的地面上跑步        | 0             | 1    | 2    | 3    | 4    |
| 17、在不平坦的地面上跑步       | 0             | 1    | 2    | 3    | 4    |
| 18、快跑时急速转弯          | 0             | 1    | 2    | 3    | 4    |
| 19、单脚跳              | 0             | 1    | 2    | 3    | 4    |
| 20、在床上翻身            | 0             | 1    | 2    | 3    | 4    |
